## Band Ratios

### 1 **Title**

2  
3 Electrophysiological Frequency Band Ratio Measures Conflate Periodic and Aperiodic Neural  
4 Activity

### 5 6 **Authors**

7  
8 Thomas Donoghue<sup>1</sup>, Julio Dominguez<sup>1</sup> & Bradley Voytek<sup>1,2,3</sup>

### 9 10 *Affiliations*

11 <sup>1</sup>Department of Cognitive Science, University of California, San Diego

12 <sup>2</sup>Halcioğlu Data Science Institute, University of California, San Diego

13 <sup>3</sup>Neurosciences Graduate Program, University of California, San Diego

### 14 15 *Corresponding Author*

16 Thomas Donoghue: [tdonoghue.research@gmail.com](mailto:tdonoghue.research@gmail.com)

### 17 18 *Author Contributions*

19 Donoghue & Voytek initiated and designed the study. Dominguez & Donoghue performed the  
20 analyses. Donoghue drafted and all authors edited and contributed to the manuscript.

### 21 22 **Disclosures**

#### 23 24 *Conflicts of Interest*

25 The authors declare no competing interests.

#### 26 27 *Funding Sources*

28 Voytek is supported by the Whitehall Foundation (2017-12-73), the National Science Foundation  
29 under grant BCS-1736028, and the NIH National Institute of General Medical Sciences grant  
30 R01GM134363-01.

### 31 32 **Acknowledgements**

33  
34 We would like to thank members of the Voytek Lab for insightful comments and suggestions  
35 throughout this project. We would also like to express gratitude to the many people involved in  
36 generating the open-access datasets and developing the open-source tools that made this project  
37 possible.

## Band Ratios

### 39 **Abstract**

40  
41 A common analysis measure for neuro-electrophysiological recordings is to compute the  
42 power ratio between two frequency bands. Applications of band ratio measures include  
43 investigations of cognitive processes as well as biomarkers for conditions such as attention-deficit  
44 hyperactivity disorder. Band ratio measures are typically interpreted as reflecting quantitative  
45 measures of periodic, or oscillatory, activity, which implicitly assumes that a ratio is measuring the  
46 relative powers of two distinct periodic components that are well captured by predefined frequency  
47 ranges. However, electrophysiological signals contain periodic components and a 1/f-like aperiodic  
48 component, which contributes power across all frequencies. In this work, we investigate whether  
49 band ratio measures reflect power differences between two oscillations, as intended. We examine  
50 to what extent ratios may instead reflect other periodic changes—such as in center frequency or  
51 bandwidth—and/or aperiodic activity. We test this first in simulation, exploring how band ratio  
52 measures relate to changes in multiple spectral features. In simulation, we show how multiple  
53 periodic and aperiodic features affect band ratio measures. We then validate these findings in a  
54 large electroencephalography (EEG) dataset, comparing band ratio measures to parameterizations  
55 of power spectral features. In EEG, we find that multiple disparate features influence ratio measures.  
56 For example, the commonly applied theta / beta ratio is most reflective of differences in aperiodic  
57 activity, and not oscillatory theta or beta power. Collectively, we show how periodic and aperiodic  
58 features can drive the same observed changes in band ratio measures. Our results demonstrate how  
59 ratio measures reflect different features in different contexts, inconsistent with their typical  
60 interpretations. We conclude that band ratio measures are non-specific, conflating multiple possible  
61 underlying spectral changes. Explicit parameterization of neural power spectra is better able to  
62 provide measurement specificity, elucidating which components of the data change in what ways,  
63 allowing for more appropriate physiological interpretations.

### 64 65 **Keywords**

66  
67 neural oscillations, frequency band ratios, spectral power ratios, theta / beta ratio, theta / alpha  
68 ratio, alpha / beta ratio, electroencephalography, 1/f activity, aperiodic neural activity

### 69 70 **Abbreviations**

71  
72 EEG: electroencephalography; MEG: magnetoencephalography; ECoG: electrocorticography; LFP:  
73 local field potential; TBR: theta / beta ratio; TAR: theta / alpha ratio; ABR: alpha / beta ratio; CF:  
74 center frequency; PW: power; BW: bandwidth; EXP: aperiodic exponent; ADHD: attention-deficit  
75 hyperactivity disorder

76

## Band Ratios

### 77 **Materials Descriptions & Availability Statements**

78

#### 79 **Project Repository**

80

81 This project is also made openly available through an online project repository in which the code  
82 and data are made available, with step-by-step guides through the analyses.

83

84 Project Repository: <http://github.com/voytekresearch/BandRatios>

85

#### 86 **Datasets**

87

88 This project uses simulated data, literature text mining data, and electroencephalography data.

89

##### 90 *Simulated Data*

91 The simulations used in this project are created with openly available software packages.  
92 Settings and code to re-generate simulated data is available with the open-access code for the  
93 project. Copies of the simulated data that were used in this investigation are available in the project  
94 repository.

95

##### 96 *Literature Data*

97 Literature data for this project was collected from the PubMed database. Exact search terms  
98 used to collect the data are available in the project repository. The exact data collected from the  
99 literature and meta-data about the collection are saved and available in the project repository.

100

##### 101 *EEG Data*

102 The EEG data used in this project is from the openly available dataset, the 'Multimodal  
103 Resource for Studying Information processing in the Developing Brain' (MIPDB) database. This  
104 dataset is created and released by the Childmind Institute. This dataset was released and is re-used  
105 here under the terms of the Creative Commons-Attribution-Non-Commercial-Share-Alike License  
106 (CC-BY-NC-SA), and is described in (Langer et al., 2017).

107

108 Child Mind Institute: <https://childmind.org>

109 Data Portal: [http://fcon\\_1000.projects.nitrc.org/indi/cmi\\_eeg/](http://fcon_1000.projects.nitrc.org/indi/cmi_eeg/)

110

#### 111 **Software**

112

113 Code used and written for this project was written in the Python programming language. All the  
114 code used within this project is deposited in the project repository and is made openly available  
115 and licensed for re-use.

116

117 As well as standard library Python, this project uses 3<sup>rd</sup> party software packages *numpy* and *pandas*  
118 for data management, *scipy* for data processing, *matplotlib* and *seaborn* for data visualization and  
119 *MNE* for managing and pre-processing data.

120

121 This project also uses open-source Python packages developed and released by the authors:

122

123 Simulations and spectral parameterization were done using the FOOOF toolbox.

124 Code Repository: <https://github.com/foof-tools/foof>

125 Literature collection and analyses were done using the LISC toolbox.

126 Code Repository: <https://github.com/lisc-tools/lisc>

127

## Band Ratios

### 128 **Introduction**

129

#### 130 **1.1 History & Introduction of Band Ratio Measures**

131

132 Studies in cognitive and clinical neuroscience employ a broad range of analyses that are  
133 designed to measure how electrophysiological measures vary with, and potentially predict, features  
134 of interest such as behavioral outputs and disease states. Many such analyses focus on putative  
135 rhythmic, or oscillatory, activity, organized into distinct frequency bands such as theta, alpha and  
136 beta, that will collectively be referred to as 'periodic' activity. One such analysis method is to  
137 calculate the ratio of power between two of these pre-specified frequency bands. For example, the  
138 theta / beta ratio is calculated as the average power in the theta band, typically 4-8 Hz, divided by  
139 the average power in the beta band, typically within the range of 13-30 Hz. Such measures can be  
140 applied to electroencephalography (EEG), magnetoencephalography (MEG), electrocorticography  
141 (ECoG) and/or local field potential (LFP) data and have been argued to be a biomarker for a variety  
142 of cognitive correlates (for example, attentional control: Angelidis, van der Does, Schakel, &  
143 Putman, 2016), and clinical disorders (for example, ADHD: Arns, Conners, & Kraemer, 2013; or  
144 Alzheimer's: Cassani, Estarellas, San-Martin, Fraga, & Falk, 2018).

145

146 An early example of such an approach was to measure, from the correlogram of EEG data,  
147 the ratio of the dominant rhythm to the 'background' activity (Daniel, 1964). This measure was  
148 developed to leverage emerging tools for spectral analysis to quantify electrophysiological features  
149 of interest and integrate computational approaches, in what would later come to be referred to as  
150 'quantitative EEG' or 'qEEG'. As spectral power estimation procedures became more common,  
151 studies began using frequency band ratios calculated directly from estimations of band powers  
152 extracted from power spectra, such as the ratio of theta to alpha power (Matoušek, 1968), which is  
153 now the standard approach for calculating frequency band ratio measures (see Figure 1A).

154

155 Early work used band ratio measures because they were found to be more stable than either  
156 absolute or relative measures of individual frequency band powers (Daniel, 1964; Matoušek, 1968).  
157 Relative power measures, including band ratios, are also used as a data normalization method, to  
158 control for potential differences in confounds such as skull thickness and volume conduction, that  
159 otherwise make absolute measures difficult to compare and interpret across individuals. Several  
160 investigations also reported correlated changes between frequency bands, such as a frequency  
161 'slowing', whereby low frequency power increases and high frequency power decreases, and  
162 therefore recommended frequency band ratio measures as an ideal measure to capture such  
163 changes (Lubar, 1991).

164

#### 165 **1.2 – Applications of Band Ratio Measures**

166

167 In cognitive neuroscience, band ratio measures are often used in EEG studies investigating  
168 possible physiological correlates of behaviors of interest, including investigations exploring  
169 vigilance and alertness (Matoušek & Petersén, 1983), cognitive development and aging (Clarke et  
170 al., 2001), reward processing (Schutter & Van Honk, 2005), and affect (Putman et al., 2010). One of  
171 the most consistent lines of research in this area focuses on the theta / beta ratio as a potential  
172 biomarker for executive function, and in particular attentional processing (Angelidis et al., 2016;

## Band Ratios

173 Gordon et al., 2018; Lubar, 1991), with recent reports investigating, for example, cognitive control  
174 (Angelidis et al., 2018), and attentional control (van Son et al., 2019). Other work using EEG  
175 experiments have explored ratio measures in learning and memory, examining, for example, short  
176 term memory using the theta / beta ratio (Trammell et al., 2017), and memory impairment using the  
177 theta / gamma ratio (Moretti et al., 2009). Similar work in animals has investigated the theta / delta  
178 ratio in hippocampal recordings during associative learning paradigms in rabbits (Nokia et al., 2008)  
179 and rats (Kim et al., 2016).

180  
181 Frequency band ratio measures have also been used to explore changes within and between  
182 individuals in contexts such as state mapping and sleep scoring, and work in development and  
183 aging. In developmental work, ratio measures have been included in investigations of age related  
184 electrophysiological changes (Clarke et al., 2001; Gasser et al., 1988; Matoušek & Petersén, 1973).  
185 Several proposed approaches for automated sleep stage classification have also used band ratio  
186 measures and found them to be useful measures (Costa-Miserachs et al., 2003; Krakovská &  
187 Mezeiová, 2011; Reed et al., 2017; van Luijtelaaar & Coenen, 1984). This includes work using the  
188 theta / delta ratio for sleep scoring of hippocampal local field data in rats (Costa-Miserachs et al.,  
189 2003; van Luijtelaaar & Coenen, 1984), and delta / beta ratio for human data analysis, including EEG  
190 (Krakovská & Mezeiová, 2011) and ECoG (Reed et al., 2017).

191  
192 In clinical neuroscience, band ratios are also a common approach, including in studies  
193 seeking biomarkers for diagnosis, clinical monitoring, and potential intervention. Investigations into  
194 the potential clinical utility of band ratio measure include investigations of anesthesia (Long et al.,  
195 1989), disorders of consciousness (Pfurtscheller et al., 1986), multiple sclerosis (Keune et al., 2017),  
196 cerebral ischemia (Sheorajpanday et al., 2009), and Parkinson's disease (Geraedts et al., 2018). In  
197 psychiatry, band ratios measures have been applied in studies of autism (Wang et al., 2016) and as  
198 a potential biomarker for psychotic disorders (Howells et al., 2018). Band ratios are also commonly  
199 investigated in the search for biomarkers for mild-cognitive impairment, dementia, and Alzheimer's  
200 (Bennys et al., 2001; Moretti et al., 2013; Penttilä et al., 1985), recently reviewed in (Cassani et al.,  
201 2018).

202  
203 The most common clinical application of band ratios measures is in investigations of  
204 attention-deficit hyperactivity disorder (ADHD) (Loo & Makeig, 2012). After early work reported a  
205 relative increase in theta and decrease in beta in ADHD, theta / beta ratios were proposed as a  
206 potential biomarker for the disorder (Lubar, 1991), which prompted a large number of studies  
207 investigating the theta / beta ratio as a descriptive feature and potential diagnostic biomarker for  
208 ADHD (see reviews in Arns, Conners, & Kraemer, 2013 & Snyder & Hall, 2006). Initial work was very  
209 promising with an early meta-analysis supporting that theta / beta ratios may be a predictive marker  
210 of ADHD, reporting a pooled effect size of 3.08 (Snyder & Hall, 2006). However, a more recent  
211 review found much weaker support for this conclusion, also reporting that the effect size of theta /  
212 beta ratios differentiating between ADHD and control groups has been decreasing across time  
213 (Arns et al., 2013). Notably, the theta / beta ratio has been investigated as a potential diagnostic  
214 marker of ADHD (Snyder et al., 2015), and although this led to approval by the Food and Drug  
215 Administration of the United States, inconsistent evidence regarding the efficacy of using the theta  
216 / beta ratio in diagnostic practice has led to a practice advisory against using it (Gloss et al., 2016).  
217

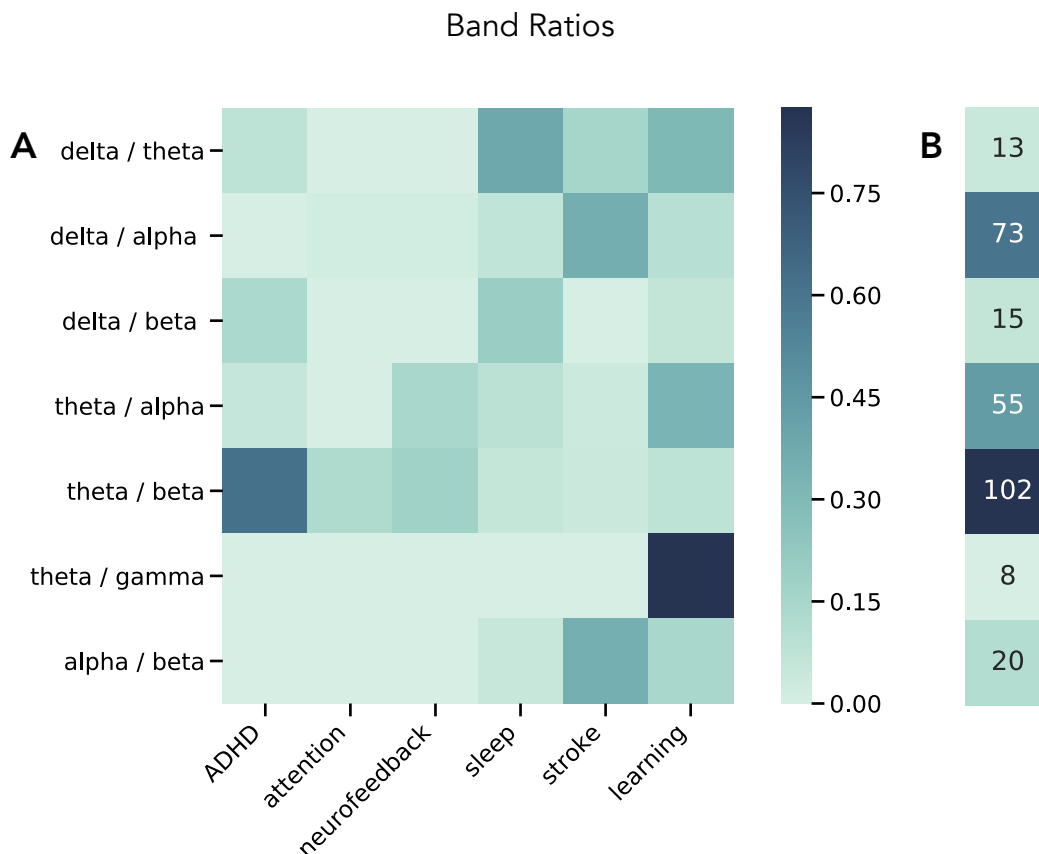

**Figure 1. Literature Analysis of Band Ratio Related Articles.** **A)** Associations between published journal articles referring to band ratio measures and cognitive and clinical associations. Each cell represents the proportion of articles referring to a specified band ratio measure that also mentions the corresponding association term. **B)** Total counts of the number of articles mentioning each band ratio measure.

218 As well as being used in investigations seeking diagnostic biomarkers, band ratio measures  
 219 are commonly targeted in neurofeedback paradigms. This includes clinical applications using  
 220 protocols aimed at manipulating theta / beta ratio for the treatment of ADHD (Arns et al., 2014),  
 221 and as potential treatments for disorders such as autism (Wang et al., 2016). Non-clinically related  
 222 neurofeedback protocols using band ratio measures have also been explored, including  
 223 investigations aimed at manipulating and improving attentional and executive functions (Studer et  
 224 al., 2014; Vernon et al., 2003) and relaxation (Egner et al., 2002; Raymond et al., 2005).  
 225

226 Collectively, band ratio measures are used across basic, clinical, and applied neuroscience  
 227 to examine a wide variety of their correlates. To explore the breadth of reported band ratio  
 228 correlations, we also ran an automated literature search that collects information on the number of  
 229 published articles that reference each ratio term and their major associates (Figure 1). This analysis  
 230 shows that theta / beta ratio measures are the most common, though a variety of other band ratios  
 231 are commonly applied, with distinct applications. We find over 250 articles that mention band ratio  
 232 measures, supporting that these are a relatively common method to apply to electrophysiological  
 233 data, across a wide range of applications. This is also likely an underestimate, as our text-mining  
 234 approach is limited to specific phrases that appear only in article abstracts.  
 235

## Band Ratios

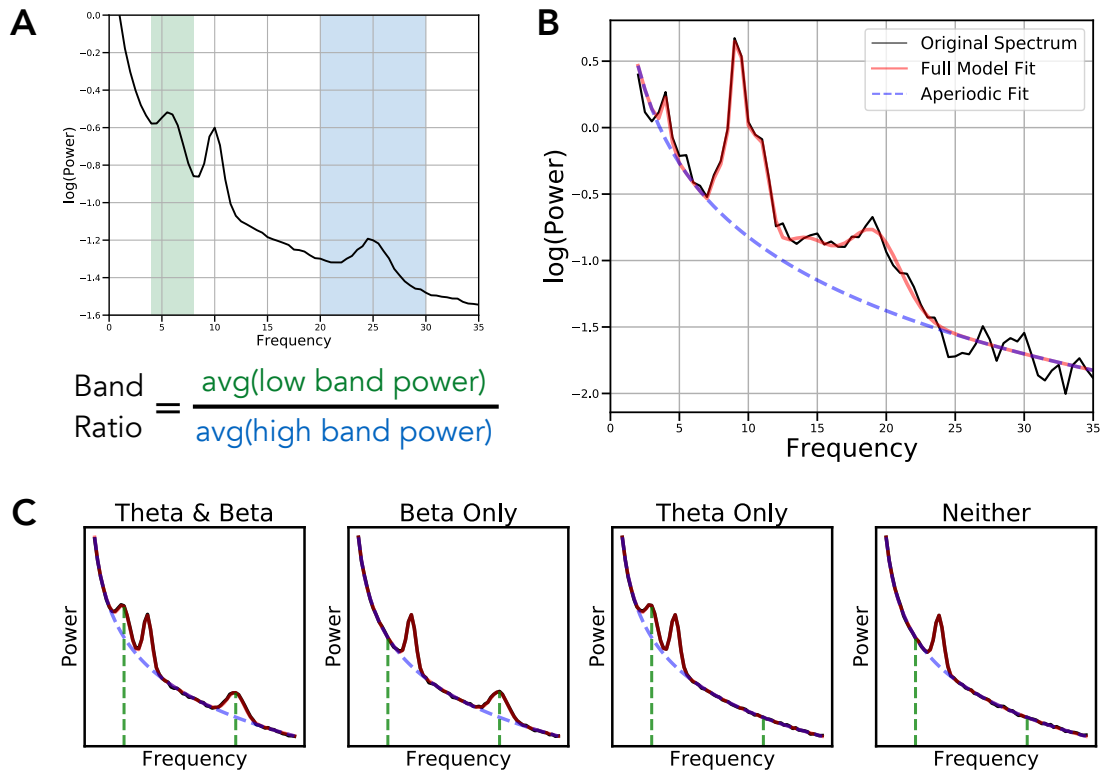

**Figure 2. Overview of Band Ratio Measures and Spectral Parameters.** **A)** An example power spectrum in which shaded regions reflect the theta (4-8 Hz) and beta band (20-30 Hz) respectively. Band ratio measures, such as the theta / beta ratio are taken by dividing the average power between these two bands. **B)** An example of a parameterized power spectrum, in which aperiodic activity is separated from measured periodic components. **C)** Examples of simulated power spectra with and without component oscillations of the theta / beta ratio. Black lines indicate the simulated data, with red line reflecting the model fit, the dashed blue line indicating the aperiodic component of the model fit, and the green lines indicating the location of canonical theta and beta oscillations. Band ratio measures, though intended to measure periodic activity, will reflect power at the pre-determined frequencies regardless of whether there is evidence of periodic activity at these frequencies.

### 236 1.3 – Methodological Properties & Interpretations of Band Ratio Measures

237

238

239 Given the popularity of band ratios across domains, and their reported clinical utility, it is  
 240 important to investigate and understand the properties and assumptions of such analyses, and how  
 241 those assumptions relate to their interpretations. In this investigation we examine whether the  
 242 general conception of band ratios as measures that specifically reflect periodic neural activity is well  
 243 founded in the face of work showing that periodic properties of electrophysiological data are highly  
 244 variable, often violating the assumptions of predefined frequency bands, and that they co-exist with  
 245 variable and dynamic aperiodic activity (Haller et al., 2018).

246

247 Methodologically, studies using band ratios typically follow a stereotyped procedure  
 248 whereby power in pre-defined, fixed frequency bands are calculated, from which a ratio is  
 249 calculated. Band ratios are typically calculated from absolute power values, though some studies  
 use relative or normalized power measures in which the power within a band is normalized by total



## Band Ratios

250 power. Because ratios typically display a non-normal, skewed distribution, they are often log-  
251 transformed before further analysis.

252

253 This ratio measure is then used as an electrophysiological marker that is then either analyzed  
254 for potential correlations with features of interest, and/or used as a target in neurofeedback  
255 paradigms. Band ratio measures are often conceptualized as capturing the proportion of a 'slower'  
256 frequency band relative to some 'faster' one, and are often interpreted as a relative 'slowing' of  
257 neural activity (eg: Monastra, Lubar, & Linden, 2001; Poza, Hornero, Abásolo, Fernández, & Mayo,  
258 2008) or as a shift of power from one band to another (eg: Gasser, Verleger, Bächer, & Sroka, 1988),  
259 which conceptualize one process explaining a change in periodic activity. Other interpretations  
260 focus on interpreting and investigating ratio measures more in terms of changes within the  
261 component bands, for example interpreting a decrease in theta / beta ratio as changes in the theta  
262 or beta band (eg: Clarke et al., 2013), which conceptualizes one or more distinct changes in periodic  
263 bands. Differences in these such interpretations include whether ratio measures are conceptualized  
264 to reflect one change of reapportioning activity, or potentially multiple changes in distinct bands.

265

266 What is common across these conceptualizations is that they interpret ratio measures as  
267 reflecting periodic power, and so presume, as many investigations do, that pre-specified frequency  
268 bands specifically measure periodic oscillatory activity. For this assumption to be valid, defined  
269 frequency bands of interest, for example, 4-8 Hz theta, must capture periodic activity that is to be  
270 considered as relating to that band. A known problem with applying predefined frequency bands  
271 uniformly across all participants is that variation in center frequencies can lead to misestimations of  
272 the desired features. This can be an underestimation, if frequency variation causes band power to  
273 'move' outside the canonical range, or an overestimation, if power from an adjacent frequency band  
274 is captured in the examined range. Similar issues can arise if the bandwidth of frequency bands  
275 violates expectations and/or is different between groups. These potential periodic confounds  
276 challenge the assumption that band ratio measures relate specifically to relative periodic power (see  
277 Figure 3A).

278

279 An example of this issue has been previously demonstrated in a sample of participants with  
280 ADHD, whereby an increased theta / beta ratio, as measured using canonical band definitions, was  
281 found to actually reflect a slowed alpha peak in the ADHD group (Lansbergen et al., 2011). In this  
282 case, the theta / beta ratio calculated using individualized frequency bands found no difference  
283 between groups. This suggests that, in at least some cases, frequency variation can lead to  
284 measurements and interpretations of band ratios that do not accurately reflect the actual properties  
285 of the data. This has led to suggestions that band ratios measure should be computed using  
286 individualized frequency bands (Saad et al., 2018).

287



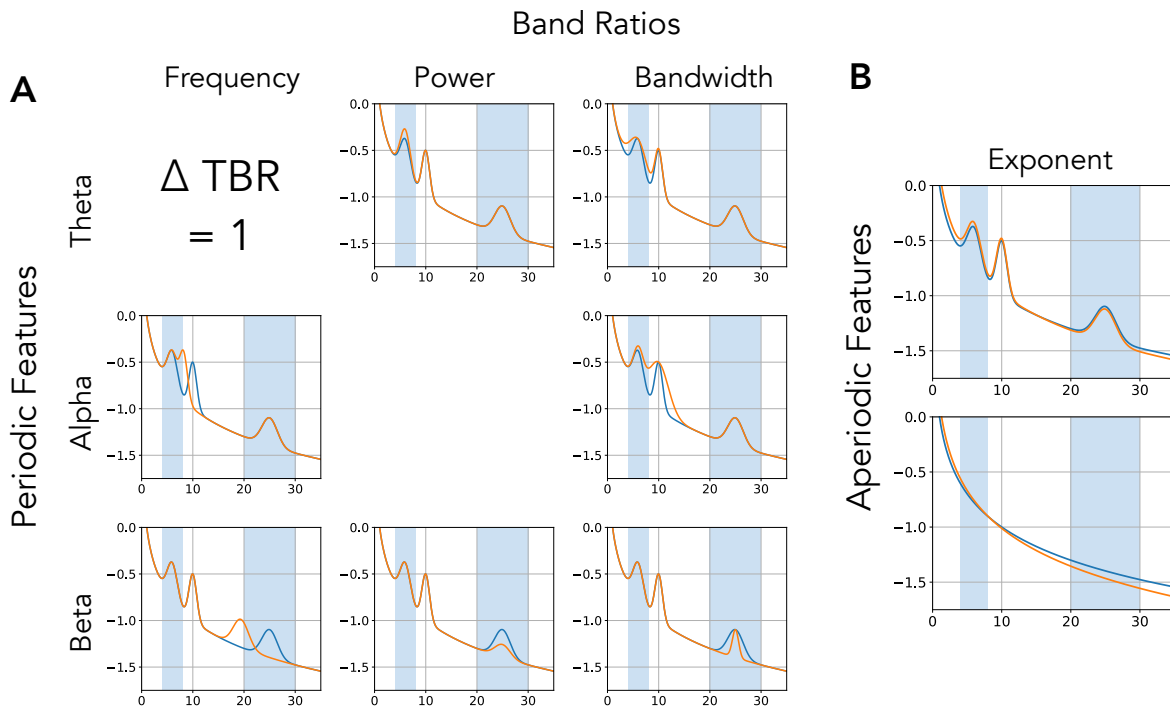

**Figure 3. Equivalent Band Ratio Differences from Distinct Changes.** Simulations demonstrating the underdetermined nature of band ratio measures. In each case, the power spectrum plotted orange has the same difference of measured theta / beta ratio from the reference spectrum, in blue. This difference in ratio can arise from changes in multiple different features of the data, including a shift in: **A)** the periodic properties such as the center frequency, power or bandwidth of oscillations, and/or from a shift in; **B)** aperiodic component of the data. Differences in aperiodic activity can induce differences in measured band ratios, even without any periodic components present.

288            Beyond the periodic confounds, a broader issue is the implicit assumption that frequency  
 289 definitions reflect periodic activity in the data, and that this activity can be specifically captured by  
 290 measuring power averaged across a frequency range. This assumption is in general invalid, as  
 291 electrophysiological activity includes not only periodic components, but a 1/f-like distributed  
 292 aperiodic component (Haller et al., 2018; B. J. He, 2014), which has power at all frequencies, but  
 293 does not consist of periodic activity (see Figure 2B). The presence of this 1/f-like activity, henceforth  
 294 referred to as the ‘aperiodic component’, entails that there will always be power in a given frequency  
 295 range, but that this power should not necessarily be assumed to reflect periodic activity. Rather,  
 296 power at a particular frequency, or frequency range, reflects, at least in part, aperiodic activity, and  
 297 only partially, if at all, reflects periodic activity. A marker that there is actual periodic power in a  
 298 signal is that there should be a band specific peak over and above this aperiodic component  
 299 (Buzsáki et al., 2013). To specifically measure this periodic component of the signal, one should  
 300 measure the power in this band specific peak relative to the aperiodic component of the signal  
 301 (Haller et al., 2018).

302  
 303            Band ratio measures, as currently applied, do not address the confound of ubiquitous  
 304 aperiodic activity in neural signals. Aperiodic neural activity is known to be variable both within  
 305 (Podvalny et al., 2015) and between individuals (Voytek et al., 2015). This variability raises the  
 306 possibility that band ratio measures may reflect, at least partially, aperiodic activity and that

## Band Ratios

307 measured differences within and between individuals may be driven by differences in aperiodic  
308 properties of the data (see Figure 3B). The very observation that there are correlated changes across  
309 frequency bands that helped popularize band ratio measures (Lubar, 1991) can even be interpreted  
310 to support the suggestion that a parsimonious description of the data could be changes in aperiodic  
311 properties, across all frequencies. This is also broadly consistent with the interpretations of ratios  
312 reflecting 'substitutions' of power between bands (Gasser et al., 1988) in the sense that one process  
313 explains the changes across different frequency regions (though inconsistent with this being a shift  
314 of periodic activity).

315

316 In summary, band ratio measures are a common analyses measure that are calculated across  
317 two frequency bands that are designed to, and are interpreted as, reflecting relative periodic  
318 activity. However, even when oscillations are clearly present, variations in the measure may reflect  
319 not only the power across the two bands, but may be driven by differences in the center frequencies,  
320 and/or the bandwidths of such periodic components and, can also be driven by changes in  
321 aperiodic activity with or without periodic activity being present (see Figure 2C). Altogether, this  
322 suggests that band ratio measures are underdetermined, whereby a change in one or many  
323 different features of the data may drive analogous differences in band ratio measures (Figure 3). If  
324 so, not only are typically interpretations of band ratio measures unsupported, but band ratio  
325 measures, by themselves, may be essentially uninterpretable, as underlying physiological causes of  
326 changes in the measure are undecipherable from the measure itself, but reflect different properties  
327 of the data.

328

329 To investigate these issues, we examine the properties and validity of band ratio measures,  
330 including, 1) how are band ratio measures influenced by different features of periodic activity,  
331 including center frequency, power and bandwidth, and 2) how band ratio measures are influenced  
332 by changes in aperiodic properties of the data, including the aperiodic exponent and offset. We  
333 start by systematically exploring the properties of band ratio measures across simulated data that  
334 mimic the statistics of real data, for which ground truth is known. We use these simulations to  
335 evaluate how changes in different features, and their combinations, influence band ratio measures.  
336 We follow by analyzing a large EEG dataset ( $n = 126$ ) in which we applied band ratio measures and  
337 compared ratios to methods that explicitly parameterize periodic and aperiodic features of the data,  
338 to infer which neural features influence and contribute to band ratio measures. We find that many  
339 different features of the data can give rise to band ratio differences, making them effectively  
340 uninterpretable in isolation, without additional context of the rest of the power spectral features  
341 involved. Therefore, we conclude that band ratios should not be interpreted as a well-posed  
342 method to specifically measure periodic properties of neural times series, and comment on how the  
343 methodological findings from this work can be used to interpret prior work, and what it suggests  
344 for future investigations.

345

## Band Ratios

### 346 **Methods**

347

348 In order to investigate the properties of frequency band ratios, we explored calculating band  
349 ratio measures across simulated power spectra, for which ground truth values were known, as well  
350 as investigating their application in EEG data. As a comparison to the band ratio measures, periodic  
351 (oscillatory) and aperiodic properties of power spectra were characterized using the fitting-  
352 oscillations-&-one-over-f (FOOOF) toolbox (Haller et al., 2018). Band ratio measures were  
353 compared to the outputs of the parameterization of the power spectra, which quantifies the center  
354 frequency (CF), power (PW) and bandwidth (BW) of identified periodic components, as well as the  
355 exponent and offset (described below) of the aperiodic component. Using these parameterizations,  
356 we evaluate which components of the data the band ratio measures reflect. For all analyses,  
357 canonical frequency band definitions were defined as: theta (4-8 Hz), alpha (8-13 Hz), beta (13-30  
358 Hz).

359

360 Analyses were done using Python (version 3.7), including common libraries numpy, pandas,  
361 scipy, matplotlib and seaborn for analysis and visualization. The MNE library was used for managing  
362 and processing EEG data (Gramfort et al., 2014). Custom code was used to calculate band ratio  
363 measures and perform analyses. All code for this project is available in the project repository  
364 (<https://github.com/voytekresearch/BandRatios>).

365

#### 366 **2.1 Literature Analysis**

367

368 The literature analysis was done use the 'Literature Scanner' (LISC) Python toolbox  
369 (Donoghue, 2019). Briefly, this toolbox allows for collecting and analyzing literature data by curating  
370 search terms of interest, gathering related articles from available databases, and analyzing the  
371 results. For this analysis, a list of band ratio terms (e.g., "theta / beta ratio") and related association  
372 terms (e.g., "attention"), with relevant synonyms and exclusion words, was manually curated.  
373 Searches were performed to determine the number of articles in the PubMed database that  
374 reference these terms in their abstract, and the number of co-occurrences of band ratio terms with  
375 association terms. Association scores were calculated as the proportion of articles referencing a  
376 band ratio measure that also mention one of the included association terms.

377

#### 378 **2.2 Simulations**

379

380 Neural power spectra were simulated to match the statistics of electrophysiological neural  
381 data, by combining a 1/f-like aperiodic component with overlying peaks of periodic activity, with  
382 overlying noise (Haller et al., 2018). The aperiodic component describes the 1/f-like characteristic  
383 of neural power spectra and is entirely described by the aperiodic 'exponent' and 'offset.' The  
384 aperiodic exponent, meaning the  $\chi$  in  $\frac{1}{f^\chi}$ , describes the steepness of the 1/f, and the 'offset,'  
385 describes the vertical translation of the aperiodic activity. Periodic components describe putative  
386 oscillations which display power above the aperiodic component. Periodic components are  
387 simulated as Gaussians, and are described by a 'center frequency' (CF) in hertz, 'power' (PW) from  
388 the aperiodic component to the oscillatory peak in arbitrary units (au), and 'bandwidth' (BW) which  
389 describes the width of the peak, also measured in hertz. The simulation ultimately follows:

### Band Ratios

390 
$$P = L + \sum G_n$$

391 in which  $L$  is the aperiodic component, described as

392 
$$L = 10^b * \frac{1}{f^\chi}$$

393 in which  $b$  is the offset and  $\chi$  is the exponent. On top of this, periodic components are added with  
394 each of  $n$  peaks described as a Gaussian, as:

395 
$$G_n = a * \exp\left(\frac{-(F - c)^2}{2 * w^2}\right)$$

396 in which  $c$  is the peak center frequency, and  $a$  and  $w$  are the height and width of the gaussian,  
397 equivalent to the power and bandwidth of the peak.

398

399 Spectra were simulated for the frequency range of 1-35 Hz, with a 0.5 Hz frequency  
400 resolution. Default aperiodic and periodic parameter values were chosen to capture physiologically  
401 realistic values. A small amount of normally distributed noise (0.005 au) was added to all spectra to  
402 emulate real power spectra.

403

404 We calculated band ratios from simulated power spectra by dividing mean power across the  
405 low band range by the mean power across a high band range. We calculated the theta / beta ratio,  
406 theta / alpha ratio, and alpha / beta ratio.

407

408 To measure how spectral parameters relate to band ratio measures, spectra were simulated  
409 where a single parameter was varied across a range while the remaining parameters were kept at  
410 their default values. From these spectra the theta / beta, theta / alpha and alpha / beta ratios were  
411 calculated to track how individual parameters affect ratio measures. Since CF, PW, and BW are  
412 specific to a peak, they were all individually varied for both low-band and high-band peaks. The  
413 ranges of values for each parameter are given in supplemental tables 1 & 2.

414

415 We then studied how band ratio measures are affected by multiple interacting changes in  
416 spectral parameters. Further simulations were carried out as two parameters from the set {CF, PW,  
417 BW, EXP} were simultaneously varied across their respective ranges. All combinations of paired  
418 parameter simulations were calculated and analyzed. The default parameter settings and ranges  
419 remained the same as the single parameter simulations.

420

### 421 **2.3 EEG Data Analysis**

422

423 To study how various spectral parameters affect band ratio measures, we used the openly  
424 available 'Multimodal Resource for Studying Information Processing in the Developing Brain', or  
425 MIPDB, dataset of human EEG data released by the Child Mind Institute (Langer et al., 2017). The  
426 study population is a community sample of children and adults ( $n = 126$ , age range = 6-44, age  
427 mean = 15.79, age standard deviation = 8.03, number of males = 69). Data for each subject includes  
428 resting state and task EEG data, behavioral measures, and eye tracking data. For the current  
429 investigation, we analyzed eyes-closed resting state data, collected on a 128 channel Geodesic  
430 Hydrocel system. Of the 126 participants in the dataset, 9 did not include resting state data  
431 collection, as indicated by the dataset description, and were therefore excluded. In addition, a  
432 further 6 participants were excluded from this analysis due to missing the resting state recording

## Band Ratios

433 file (1 subject) or not having enough resting data events to analyze (5 participants) leaving 111  
434 participants included in the final analysis.

435

436 In the resting state protocol, participants were instructed to fixate on a central cross, and  
437 open or close their eyes when they heard a beep, alternating between 20 second blocks of eyes  
438 open and 40 second blocks of eyes closed. The dataset includes a pre-processed and artifact  
439 corrected copy of the data, which was used here, with full details of the pre-processing described  
440 in (Langer et al., 2017). Briefly, bad electrodes were identified and interpolated, eye artifacts were  
441 regressed out of the EEG from EOG electrodes, and a PCA approach was used to remove sparse  
442 noise from the data. We further identified flat channels (channels with no data) and interpolated  
443 them, and re-referenced data to a common average reference.

444

445 For the current analyses, we used the eyes closed resting state data, and extracted the time  
446 period of 5 – 35 seconds within the 40 second eyes closed resting segments, excluding the 5  
447 seconds post and prior to eye opening. We used the first block for each participant for analysis.  
448 Power spectra were calculated for each channel using Welch's method, using 2 second windows  
449 with 25% overlap.

450

451 We then parameterized the calculated power spectra to return estimates of periodic and  
452 aperiodic parameters. The model parameterization we used is agnostic to frequency bands, fitting  
453 peaks wherever they're found in the frequency spectrum regardless of canonical band definitions  
454 (Haller et al., 2018). We determined that activity was contained in a band if the peak of an oscillation  
455 was contained in our aforementioned band definitions. Settings for parameterizing power spectra  
456 are as follows: the width for a detected peak was bound between 1 - 8 Hz, with a maximum number  
457 of detectable peaks set at 8, a minimum threshold for detecting a peak set at 0.1 au, the threshold  
458 for detecting was set at the default value of 2 standard deviations above the noise floor, and spectra  
459 were fit in 'fixed' mode without a knee.

460

461 For all band ratio measures, we calculated Spearman correlations between spectral  
462 parameters, including center frequency, power and bandwidth of each oscillation band, as well as  
463 the aperiodic exponent, across all channels. We do not report correlations to aperiodic offset, as  
464 offset shifts by themselves do not affect ratio measures (see simulation results). In addition, we  
465 calculated Spearman correlations between each ratio measure and participants' ages, and between  
466 spectral parameters and age.

467

## Band Ratios

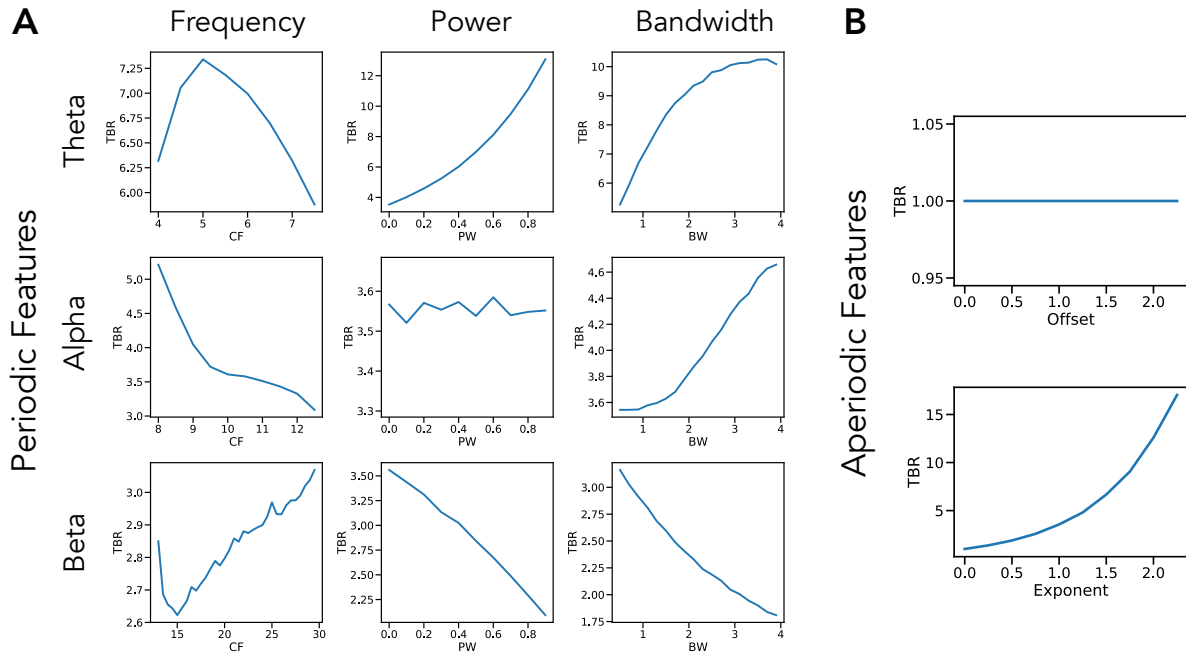

**Figure 4. Single Parameter Simulations.** Simulations of changes in measured theta / beta ratio as individual parameters are varied, including: **A)** periodic parameters and **B)** aperiodic parameters. Changes in theta center frequency show an increase in theta / beta ratio as the heightened activity is better captured in the canonical band, then decreases as activity leaves the band. Increasing theta power and bandwidth both increase TBR while increasing beta power and bandwidth decreases theta / beta ratio. The center frequency and bandwidth of alpha peaks also influences measured theta / beta ratio, even though alpha is not supposed to be included in the measure. Beta parameters essentially have the inverse effect of changes in theta parameters. Changes in aperiodic exponent also substantially impact measured theta / beta ratio.

## 468 Results

469

### 470 3.1 Simulation Results

471

472

473

474

475

476

477

478

479

480

481

482

We started by investigating, in simulation, the extent to which band ratios capture periodic power as typically interpreted, and/or to what extent they are potentially related to other periodic or aperiodic spectral parameters. Measured theta / beta ratios across simulations in which one spectral parameter was changed at a time, are reported in Figure 4. As expected, when examining periodic changes (Figure 4A) the theta / beta ratio is strongly driven by power of theta and beta oscillations. However, ratio measures can also be influenced by the center frequency and bandwidth of the theta and beta peaks. We also replicate previous work showing that the center frequency of the alpha peak can impact measures of theta / beta ratio, (Lansbergen et al., 2011), and extend this to include alpha bandwidth. For aperiodic changes (Figure 4B), we see that the aperiodic exponent has a significant effect on measured ratio values.



## Band Ratios

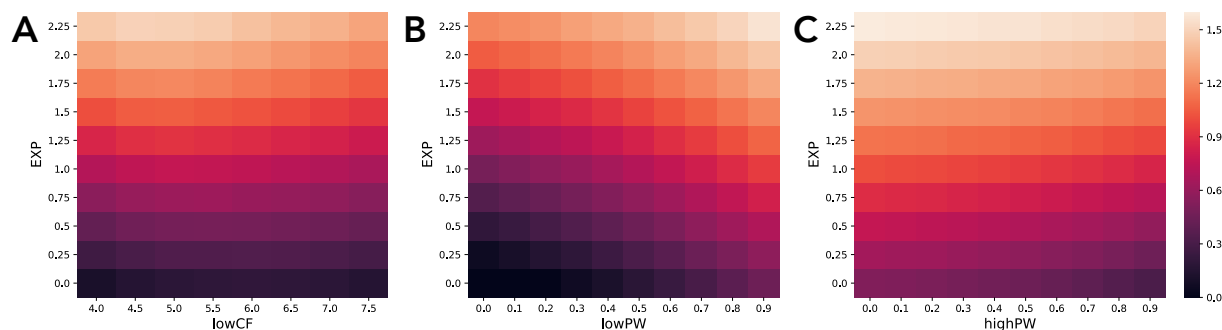

**Figure 5. Interacting Parameter Simulations.** Measured theta / beta ratio values in simulations as two spectral parameters are varied together. Ratio measures plotted in log<sub>10</sub> space due to their skewed distributions. Combinations plotted are aperiodic exponent with low band center frequency (A), as well as with low band power (B) and high band power (C). All combinations of varying parameters influence measured band ratio values.

483 Collectively, we see that a wide range of different parameter changes can affect measured  
484 ratios. In this case, 8 of the 10 parameters alter theta / beta band ratio, with the only exceptions  
485 being the aperiodic offset, which changes power equally between ratio bands, and power in the  
486 non-included band, in this case alpha (for the theta / beta ratio). Of note, however, is that the scale  
487 of this effects can be quite different, with the power of the included bands and the aperiodic  
488 exponent having the biggest impacts. The findings for other band ratio measures are consistent  
489 with those for the theta / beta ratio, with full results for them available in the project repository.  
490

491 We further explored simulations of pairwise combinations of parameter changes, to  
492 investigate how ratio measures are affected by concomitant changes in multiple parameters (Figure  
493 5). These simulations include, for example, measured theta / beta band ratios as the aperiodic  
494 exponent and theta center frequency both vary, showing an interaction between them (Figure 5A).  
495 We can see how changes in aperiodic exponent interact with power changes in the lower (Figure  
496 5B) and higher (Figure 5C) bands. These simulations also demonstrate that both features have an  
497 impact on measured ratios, and allow a comparison of scale, showing, for example, that although  
498 the influence of low band power and aperiodic exponent is of a similar magnitude, when compared  
499 to high band power, the effect of aperiodic exponent changes is relatively much larger. Collectively,  
500 through these simulations, we see that changes in different spectral parameters can interact and  
501 drive different patterns of differences in measured band ratios. Further simulations of interacting  
502 parameters across all other combinations are available in the project repository.  
503

### 504 3.2 EEG Data Results

506 We continue our investigation with EEG data recorded during resting state, and compare  
507 band ratio measures to parameterized power spectral features. For all correlations here, we report  
508 results across all channels. Re-running these analyses with channel groups, using frontal, central,



## Band Ratios

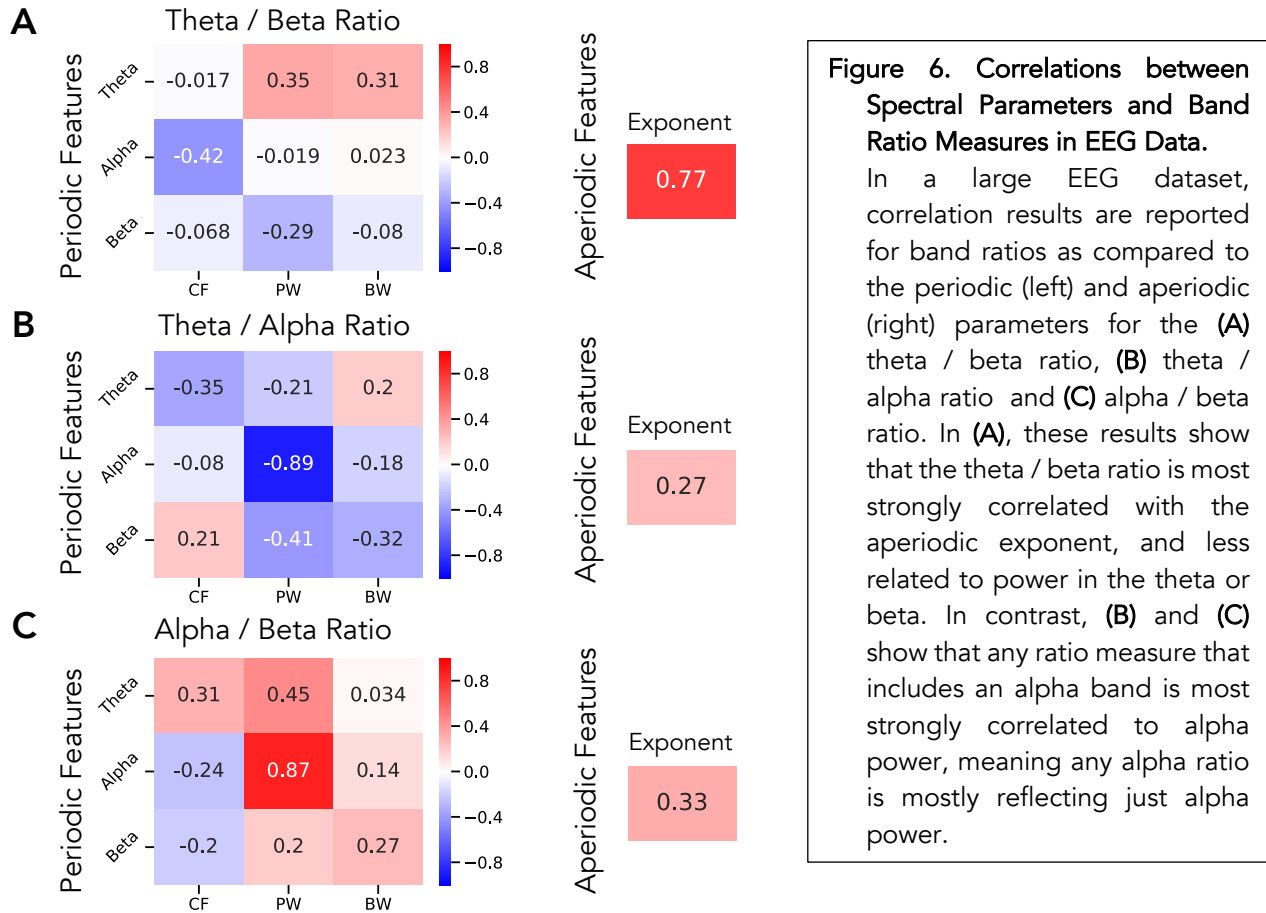

**Figure 6. Correlations between Spectral Parameters and Band Ratio Measures in EEG Data.**

In a large EEG dataset, correlation results are reported for band ratios as compared to the periodic (left) and aperiodic (right) parameters for the (A) theta / beta ratio, (B) theta / alpha ratio and (C) alpha / beta ratio. In (A), these results show that the theta / beta ratio is most strongly correlated with the aperiodic exponent, and less related to power in the theta or beta. In contrast, (B) and (C) show that any ratio measure that includes an alpha band is most strongly correlated to alpha power, meaning any alpha ratio is mostly reflecting just alpha power.

509 and parietal sub-selections showed qualitatively similar patterns, the results of which are available  
510 in the project repository.

511

512 For the theta / beta ratio, within periodic spectral parameters we find, as expected, that the  
513 strongest relationship is between theta / beta ratio and theta power ( $r = 0.35$ ,  $p < 0.001$ ) with a  
514 similarly high correlation with beta power ( $r = -0.29$ ,  $p < 0.01$ ). However, when considering aperiodic  
515 parameters, we find a much stronger relationship between theta / beta ratio and aperiodic exponent  
516 ( $r = 0.77$ ,  $p < 10^{-20}$ ). The full set of spectral parameter correlations is available in Figure 6A.

517

518 In contrast, for the theta / alpha ratio, the highest correlation across both periodic and  
519 aperiodic spectral parameters was for alpha power ( $r = -0.89$ ,  $p < 10^{-35}$ ), with a much lower  
520 correlation with aperiodic exponent ( $r = 0.27$ ,  $p < 0.01$ ). This pattern of correlations was also similar  
521 for the alpha / beta ratio, with a strong correlation with alpha ( $r = 0.87$ ,  $p < 10^{-30}$ ), and a much weaker  
522 one with aperiodic exponent ( $r = 0.33$ ,  $p < 0.001$ ). Spectral parameter correlations for the theta /  
523 alpha ratio and alpha / beta ratio are available in Figure 6B & 6C respectively.

524

525 We also calculated average ratio measures and spectral parameters for each channel, across  
526 the group. Topographies of these measures are plotted in Figure 7. Here we can see, for example,  
527 that the spatial topography of the theta / beta ratio is most similar to that of the aperiodic exponent,  
528 with a strong spatial correlation ( $r = 0.77$ ,  $p < 10^{-20}$ ). The topography of alpha / beta ratio is nearly

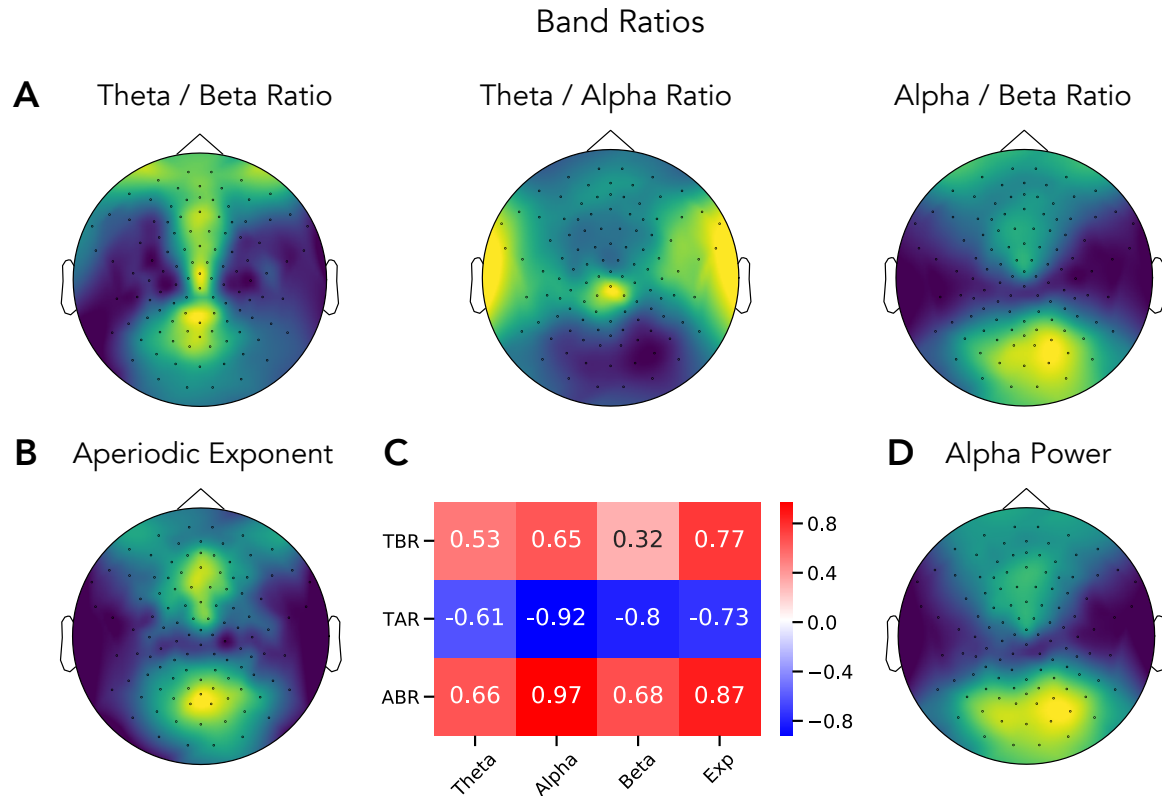

**Figure 7. Topographies of Band Ratio Measures and Spectral Parameters.** Topographical maps of the **A)** ratios measures, including the theta / beta ratio, theta / alpha ratio and alpha / beta ratio. For comparison, the topography of the aperiodic exponent (**B)** and of alpha power (**D)** are also presented. Each topography is scaled to relative range of the data, with higher values plotted in lighter colors (yellow). **C)** The spatial correlation between topographies of each ratio measure to spectral parameters including power of theta, alpha and beta, and the aperiodic exponent.

529 identical to the topography of alpha power ( $r = 0.97$ ,  $p < 10^{-70}$ ), with a strong inverse relation  
 530 between the theta / alpha ratio and alpha power ( $r = -0.92$ ,  $p < 10^{-45}$ ).

531  
 532 We also calculated how each measure correlated with age. The theta / beta ratio was found  
 533 to be highly correlated with age ( $r = .67$ ,  $p < 10^{-15}$ ), with the negative correlation indicating that  
 534 older adults have higher theta / beta ratios. In comparison, the theta / alpha ratio had a much  
 535 smaller correlation with age ( $r = -0.37$ ,  $p = 0.0001$ ) and the alpha / beta ratio was not significantly  
 536 correlated with age ( $r = -0.12$ ,  $p = 0.22$ ). For spectral parameters, the aperiodic exponent was found  
 537 to be highly correlated with age ( $r = 0.68$ ,  $p < 10^{-15}$ ), consistent with previous reports (W. He et al.,  
 538 2019; Voytek et al., 2015).

539

## Band Ratios

### 540 Discussion

541

#### 542 4.1 Methodological Discussion Points

543

544 Through investigations of both simulated and real data, we find that frequency band ratio  
545 measures, though typically applied and interpreted as reflecting the relative periodic power of  
546 distinct frequency bands, can actually reflect a large number of distinct changes in the underlying  
547 data. These band ratio measures therefore capture multiple different changes in periodic and  
548 aperiodic properties. Part of this stems from the use of predefined frequency bands of interest, as  
549 has been previously reported (Lansbergen et al., 2011; Saad et al., 2018). Here, we replicate and  
550 extend this finding, showing how center frequency, and also oscillatory bandwidth, can influence  
551 band ratio measures in ways that can be misinterpreted as reflecting power differences. In addition,  
552 we show how frequency band ratio measures may commonly capture, at least partially, aperiodic  
553 components of electrophysiological data.

554

555 Specifically, we used a parameterization model conceiving of the power spectrum as the  
556 combination of an aperiodic, 1/f-like spectrum, characterized by an offset and exponent, with  
557 overlying periodic 'peaks', each characterized by a center frequency, power (over and above the  
558 aperiodic background) and bandwidth measure. With this approach, we show many of these  
559 parameters can similarly affect band ratio measures in simulation. When applied to real data, we  
560 find that different parameters do affect ratio measures, with different patterns for different ratio  
561 measures. For example, theta / beta ratio measures mostly reflect aperiodic exponent, whereas  
562 theta / alpha and alpha / beta ratios mostly reflect alpha power. In no ratio measures did we find  
563 evidence that the measure primarily reflects power within both specified bands.

564

565 Given the underdetermined nature of band ratio measures in the face of multiple features  
566 of the data that may be changing, we conclude that band ratio measures are not an appropriate  
567 measure for characterizing electrophysiological data, at least not in isolation. This is because are  
568 uninterpretable in terms of knowing which component(s) of the data they actually reflect. Therefore,  
569 we recommend complementary or alternate approaches. These include methods that fully  
570 parameterize neural power spectra, specifically measuring periodic and aperiodic components  
571 (Haller et al., 2018), which allows for precise quantification of which features of the data vary within  
572 and between individuals.

573

574 A prior recommendation, that attempts to address center frequency differences (Lansbergen  
575 et al., 2011), is that band ratio measures should use individualized frequency bands (Saad et al.,  
576 2018). It should be noted that the recommended approach, originally proposed by (Klimesch,  
577 1999), is to use individualized bands based on an alpha band anchor point, whereby theta and beta  
578 can be defined as below and above the observed alpha peak. Though this addresses some issues  
579 with varying alpha center frequency, it does not specifically establish if there is a defined theta or  
580 beta peak, over and above aperiodic power, nor does it identify specific center frequencies should  
581 such periodic activity be present. Because this approach also does not separate aperiodic from  
582 periodic power, individualized peak detection, especially when anchored to alpha peaks, is  
583 insufficient to address the problems highlighted here.

584

## Band Ratios

585 It has previously been reported that ratio measures are stable and have high test-retest  
586 reliability within individuals (Angelidis et al., 2016; Monastra et al., 2001; Ohlund, 2000). This is not  
587 necessarily in conflict with the finding here that band ratio measures may reflect many distinct  
588 features of the data; stable test-retest reliability merely suggests that whichever feature(s) are  
589 captured by band ratios within a given subject are themselves stable. However, that band ratios  
590 across individuals, and in particular across different populations, may reflect different properties of  
591 the data may well help explain why there has been difficulty in reproducing several findings using  
592 band ratios. For example, recent failures to replicate band ratio measures include follow ups on  
593 previously reported relations with trait anxiety (van Son et al., 2018) or attentional control (van Son  
594 et al., 2019). In clinical work, there have been inconsistent findings relating the theta / beta ratio to  
595 ADHD (Liechti et al., 2013; Ogrim et al., 2012). It is possible that when investigating varying  
596 populations, different features of the data may be driving different observed ratio measures, and  
597 this may relate to the significant variance of band ratio measures and their correlates found across  
598 studies.

599

### 600 **4.2 Interpretation Related Discussion Points**

601

602 The findings cast doubt on the interpretations of prior reports that use band ratio measures  
603 and interpret them as primarily reflecting periodic power. Where such studies are reproducible,  
604 recontextualization of such findings should consider multiple possible interpretations, including, for  
605 example that, a) there is a true change in the power ratio of activity between distinct frequency  
606 bands reflecting periodic activity, b) there is a difference in periodic parameters other than power,  
607 such as in center frequency and/or bandwidth, c) band ratio measures reflect differences in  
608 aperiodic activity, or, d) some combination of the above. Based on data analyzed, the theta / beta  
609 ratio is most likely to reflect aperiodic activity, whereas the theta / alpha and alpha / beta ratios are  
610 most likely to primarily reflect alpha power. That said, ratio measures could vary across studies in  
611 what they reflect, and/or reflect interactions between parameters. Re-evaluations of prior work  
612 and/or follow up investigations should seek to re-evaluate such data to investigate which features,  
613 in each case, are driving the measured changes in band ratios, and update interpretations  
614 accordingly.

615

616 In this investigation we replicated the consistently reported finding that band ratio measures  
617 vary systematically with age (Angelidis et al., 2016; Bresnahan et al., 1999; Buyck & Wiersema, 2014;  
618 Clarke et al., 2001; Gasser et al., 1988; Monastra et al., 2001; Ogrim et al., 2012; Putman et al.,  
619 2010), as well as the finding that aperiodic activity also varies systematically with age (Voytek et al.,  
620 2015). Since we also find that band ratio measures are highly correlated with aperiodic activity  
621 (especially the theta / beta ratio), this is altogether consistent with the idea that the relation of band  
622 ratio measures to age is plausibly due to band ratios reflecting aperiodic activity. We note that the  
623 dataset used here consists of young participants, and the pattern of findings here is also consistent  
624 with recent work showing that the relation of aperiodic activity to age is also apparent in younger  
625 participants, and that changes in aperiodic activity across age better explains developmental  
626 patterns rather than previous reports of correlated changes across multiple distinct oscillation bands  
627 (W. He et al., 2019).

628

## Band Ratios

629 Overall, the EEG data analyzed here suggests that ratio measures, and the theta / beta ratio  
630 in particular, often largely reflects aperiodic activity. As well as the relationship of aperiodic activity  
631 and band ratios to age, this is also consistent with other reports that previously reported correlates  
632 of band ratios have also been found to relate to aperiodic activity. For example, when band ratios  
633 are used in sleep scoring, it is typically done with the delta / theta ratio, which we predict likely also  
634 captures aperiodic changes, which would be consistent with recent reports that aperiodic activity  
635 changes systematically with sleep (Lendner et al., 2019). Collectively, these shared correlates are  
636 consistent with suggestion that band ratio measures likely often reflect aperiodic activity.

637  
638 A key prediction, if ratio measures often reflect aperiodic properties, is that the reported  
639 findings will not be specific to the frequency ranges used to measure the ratios, as aperiodic effects  
640 should exist across all frequencies. Indeed, correlated change across frequency bands is one of the  
641 observations that led to the popularity of band ratio measures (Lubar, 1991). It has also been  
642 reported that distinct ratio measures across different frequency bands show similar patterns, for  
643 example that both delta / beta and theta / beta ratios relate to cognitive correlates (Schutter & Van  
644 Honk, 2005; Tortella-Feliu et al., 2014), both theta / alpha and theta / beta have been reported to  
645 relate to ADHD (Barry et al., 2003), and multiple different ratios show similar patterns in  
646 investigations of Alzheimer's disease (Poza et al., 2008). In cases such as these, in which different  
647 band ratio measures show approximately similar trends across a wide array of band pairs, a plausible  
648 interpretation is that these findings do not reflect correlated changes across multiple distinct  
649 frequency bands, but rather that they are all capturing frequency-agnostic aperiodic shifts.

650  
651 In neurofeedback designs, where band ratios are a target for manipulation rather than a  
652 descriptive measure, findings are also consistent with the possibility that targeting ratios at least  
653 partially manipulates aperiodic properties, rather than targeting oscillation bands specifically. For  
654 example, a recent report showed that targeting beta in a feedback design also induces changes in  
655 the alpha band (Jurewicz et al., 2018), which challenges the possibility of targeting different bands  
656 independently. Where investigations probe the specificity of neurofeedback protocols, non-specific  
657 effects have been reported, such as an effect on beta from a theta / alpha protocol (Egner et al.,  
658 2004), and changes in alpha when using a theta / beta protocol (Bazanov et al., 2018; Limin Yang  
659 et al., 2015), all of which is consistent with ratios reflecting aperiodic activity.

660  
661 If a considerable proportion of the variance of band ratios measures is due to aperiodic  
662 properties, and not well described or interpreted as band specific changes, then it becomes an  
663 open question to ask what the physiological interpretation should be, and therefore how these  
664 findings should be interpreted. One hypothesis is that the aperiodic properties of neural time series  
665 may relate the relative balance of excitatory and inhibitory activity (Gao et al., 2017). Though further  
666 work is required to explore this hypothesis and how it relates to measurements done with band  
667 ratios, this does suggest a potential link between what has been measured in band ratios, as a  
668 correlate of various cognitive markers and disease states, and potential interpretations related to  
669 excitation and inhibition. A more general review of aperiodic properties in neural data, sometimes  
670 referred to 'scale-free' activity, is available in (B. J. He, 2014).

671  
672 Particular attention should be paid to ratio measures applied in clinical applications, in which  
673 the pursuit of biomarkers based on faulty measures could hinder, rather than ameliorate, clinical

## Band Ratios

674 practice. For example, the findings here on ratio measures are consistent with the practice advisory  
675 that using theta / beta ratio measures in the context of ADHD is not an appropriate measure (Gloss  
676 et al., 2016). Rather, the prediction based on these results for ADHD would be that the oft reported  
677 theta / beta correlate is likely a reflection of differences in aperiodic activity. In other work, we have  
678 found exactly this: that aperiodic properties are correlated with theta / beta measures in a  
679 population with ADHD, and that the aperiodic measures themselves better relate not only to  
680 disease state but also to medication status (Robertson et al., 2019). For other clinical disorders that  
681 have been investigated with band ratio measures, such as Alzheimer's disease (Cassani et al., 2018),  
682 or psychotic disorders (Howells et al., 2018) we recommend that investigations should follow up on  
683 which underlying features best explain changes in ratio measures, and update interpretations and  
684 future work on biomarkers accordingly.

685  
686 A notable exception, as we found in analyzed EEG data, to ratio measures reflecting  
687 aperiodic shifts is in cases in which ratio measures include the alpha band. When the alpha band is  
688 included in the ratio, band ratio measures tend to primarily reflect alpha power. This is likely due to  
689 the prominence of the alpha band, where alpha is typically present across participants, has very  
690 high power, and is dynamic. Thus, it is logical that ratio measures that include the alpha band largely  
691 reflect alpha dynamics, as we observed here. This effect may also be exaggerated in our analysis,  
692 as we are analyzing eyes closed data, in which alpha power is most prominent, though the pattern  
693 of results is consistent when re-run on eyes open data. Investigations in which ratio measures such  
694 as delta / alpha or theta / alpha are used should investigate to what extent the dominant effect they  
695 are capturing is alpha dynamics. Overall we recommend that reports from studies using band ratios  
696 including alpha should consider if the findings are likely to be largely explained by alpha dynamics.  
697



## Band Ratios

### 698 **Conclusion**

699

700 Frequency band ratio measures are a common analysis approach applied to neural field  
701 data, including EEG, MEG, ECoG and LFP. Band ratio approaches have been applied across many  
702 domains, including basic research investigating executive functions, learning and memory, and  
703 sleep; in clinical investigations including investigating ADHD and dementia; and in applied work  
704 leveraging them for neurofeedback applications. Though typically interpreted as a normalized  
705 measure reflecting the relative power of distinct periodic components, here we show that band ratio  
706 measures can reflect not only multiple features of periodic neural activity, including the center  
707 frequency, power and bandwidth of periodic components, but can also be driven by variations in  
708 aperiodic activity. This is demonstrated in simulation, and also in empirical work applied to a large  
709 EEG dataset in which we show how multiple spectral features relate to measured band ratios,  
710 making them an imprecise metric. For example, the most dominant contributor to the theta / beta  
711 ratio is the aperiodic exponent, whereas the theta / alpha and alpha / beta ratio predominantly  
712 reflect alpha power. Overall, band ratio measures are found to be underdetermined, and so across  
713 participants, recording modalities, species, and contexts may reflect different components of the  
714 signal. This makes comparisons with band ratio measures difficult, if not impossible, and questions  
715 their typical interpretations as reflecting periodic activity. As an alternative, we recommend that  
716 parameterization of neural power spectra is able to better capture which components of neural  
717 signals vary and relate to features of interest, without conflating changes in periodic and aperiodic  
718 activity, as band ratio measures do.

719



## Band Ratios

### 720 **References**

721

722 Angelidis, A., Hageñaars, M., van Son, D., van der Does, W., & Putman, P. (2018). Do not look

723 away! Spontaneous frontal EEG theta/beta ratio as a marker for cognitive control over

724 attention to mild and high threat. *Biological Psychology*, *135*, 8–17.

725 <https://doi.org/10.1016/j.biopsycho.2018.03.002>

726 Angelidis, A., van der Does, W., Schakel, L., & Putman, P. (2016). Frontal EEG theta/beta ratio as

727 an electrophysiological marker for attentional control and its test-retest reliability. *Biological*

728 *Psychology*, *121*, 49–52. <https://doi.org/10.1016/j.biopsycho.2016.09.008>

729 Arns, M., Conners, C. K., & Kraemer, H. C. (2013). A Decade of EEG Theta/Beta Ratio Research

730 in ADHD: A Meta-Analysis. *Journal of Attention Disorders*, *17*(5), 374–383.

731 <https://doi.org/10.1177/1087054712460087>

732 Arns, M., Heinrich, H., & Strehl, U. (2014). Evaluation of neurofeedback in ADHD: The long and

733 winding road. *Biological Psychology*, *95*, 108–115.

734 <https://doi.org/10.1016/j.biopsycho.2013.11.013>

735 Barry, R. J., Clarke, A. R., & Johnstone, S. J. (2003). A review of electrophysiology in attention-

736 deficit/hyperactivity disorder: I. Qualitative and quantitative electroencephalography.

737 *Clinical Neurophysiology*, *114*(2), 171–183. [https://doi.org/10.1016/S1388-2457\(02\)00362-](https://doi.org/10.1016/S1388-2457(02)00362-0)

738 0

739 Bazanova, O. M., Auer, T., & Sapina, E. A. (2018). On the Efficiency of Individualized Theta/Beta

740 Ratio Neurofeedback Combined with Forehead EMG Training in ADHD Children.

741 *Frontiers in Human Neuroscience*, *12*. <https://doi.org/10.3389/fnhum.2018.00003>

742 Bennys, K., Rondouin, G., Vergnes, C., & Touchon, J. (2001). Diagnostic value of quantitative

743 EEG in Alzheimer's disease. *Neurophysiologie Clinique*, *31*(3), 153–160.

744 [https://doi.org/10.1016/S0987-7053\(01\)00254-4](https://doi.org/10.1016/S0987-7053(01)00254-4)

## Band Ratios

- 745 Bresnahan, S. M., Anderson, J. W., & Barry, R. J. (1999). Age-related changes in quantitative EEG  
746 in attention-deficit / hyperactivity disorder. *Biological Psychiatry*, *46*(12), 1690–1697.  
747 [https://doi.org/10.1016/S0006-3223\(99\)00042-6](https://doi.org/10.1016/S0006-3223(99)00042-6)
- 748 Buyck, I., & Wiersema, J. R. (2014). State-related electroencephalographic deviances in attention  
749 deficit hyperactivity disorder. *Research in Developmental Disabilities*, *35*(12), 3217–3225.  
750 <https://doi.org/10.1016/j.ridd.2014.08.003>
- 751 Buzsáki, G., Logothetis, N., & Singer, W. (2013). Scaling Brain Size, Keeping Timing:  
752 Evolutionary Preservation of Brain Rhythms. *Neuron*, *80*(3), 751–764.  
753 <https://doi.org/10.1016/j.neuron.2013.10.002>
- 754 Cassani, R., Estarellas, M., San-Martin, R., Fraga, F. J., & Falk, T. H. (2018). Systematic Review  
755 on Resting-State EEG for Alzheimer’s Disease Diagnosis and Progression Assessment.  
756 *Disease Markers*, *2018*, 1–26. <https://doi.org/10.1155/2018/5174815>
- 757 Clarke, A. R., Barry, R. J., Dupuy, F. E., McCarthy, R., Selikowitz, M., & Johnstone, S. J. (2013).  
758 Excess beta activity in the EEG of children with attention-deficit/hyperactivity disorder: A  
759 disorder of arousal? *International Journal of Psychophysiology*, *89*(3), 314–319.  
760 <https://doi.org/10.1016/j.ijpsycho.2013.04.009>
- 761 Clarke, A. R., Barry, R. J., McCarthy, R., & Selikowitz, M. (2001). Age and sex effects in the EEG:  
762 Development of the normal child. *Clinical Neurophysiology*, *112*(5), 806–814.  
763 [https://doi.org/10.1016/S1388-2457\(01\)00488-6](https://doi.org/10.1016/S1388-2457(01)00488-6)
- 764 Costa-Miserachs, D., Portell-Cortés, I., Torras-Garcia, M., & Morgado-Bernal, I. (2003).  
765 Automated sleep staging in rat with a standard spreadsheet. *Journal of Neuroscience*  
766 *Methods*, *130*(1), 93–101. [https://doi.org/10.1016/S0165-0270\(03\)00229-2](https://doi.org/10.1016/S0165-0270(03)00229-2)
- 767 Daniel, R. S. (1964). Electroencephalographic Correlogram Ratios and Their Stability. *Science*,  
768 *145*(3633), 721–723. <https://doi.org/10.1126/science.145.3633.721>

## Band Ratios

- 769 Donoghue, T. (2019). LISC: A Python Package for Scientific Literature Collection and Analysis.  
770 *Journal of Open Source Software*, 4(41), 1674. <https://doi.org/10.21105/joss.01674>
- 771 Egner, T., Strawson, E., & Gruzelier, J. H. (2002). EEG Signature and Phenomenology of  
772 Alpha/theta Neurofeedback Training Versus Mock Feedback. *Applied Psychophysiology*  
773 *and Biofeedback*, 27(4), 261–270. <https://doi.org/10.1023/A:1021063416558>
- 774 Egner, T., Zech, T. F., & Gruzelier, J. H. (2004). The effects of neurofeedback training on the  
775 spectral topography of the electroencephalogram. *Clinical Neurophysiology*, 115(11), 2452–  
776 2460. <https://doi.org/10.1016/j.clinph.2004.05.033>
- 777 Gao, R., Peterson, E. J., & Voytek, B. (2017). Inferring synaptic excitation/inhibition balance from  
778 field potentials. *NeuroImage*, 158, 70–78. <https://doi.org/10.1016/j.neuroimage.2017.06.078>
- 779 Gasser, T., Verleger, R., Bächer, P., & Sroka, L. (1988). Development of the EEG of school-age  
780 children and adolescents. I. Analysis of band power. *Electroencephalography and Clinical*  
781 *Neurophysiology*, 69(2), 91–99. [https://doi.org/10.1016/0013-4694\(88\)90204-0](https://doi.org/10.1016/0013-4694(88)90204-0)
- 782 Geraedts, V. J., Marinus, J., Gouw, A. A., Mosch, A., Stam, C. J., van Hilten, J. J., Contarino, M.  
783 F., & Tannemaat, M. R. (2018). Quantitative EEG reflects non-dopaminergic disease  
784 severity in Parkinson’s disease. *Clinical Neurophysiology*, 129(8), 1748–1755.  
785 <https://doi.org/10.1016/j.clinph.2018.04.752>
- 786 Gloss, D., Varma, J. K., Pringsheim, T., & Nuwer, M. R. (2016). Practice advisory: The utility of  
787 EEG theta/beta power ratio in ADHD diagnosis: Report of the Guideline Development,  
788 Dissemination, and Implementation Subcommittee of the American Academy of Neurology.  
789 *Neurology*, 87(22), 2375–2379. <https://doi.org/10.1212/WNL.0000000000003265>
- 790 Gordon, S., Todder, D., Deutsch, I., Garbi, D., Getter, N., & Meiran, N. (2018). Are resting state  
791 spectral power measures related to executive functions in healthy young adults?  
792 *Neuropsychologia*, 108, 61–72. <https://doi.org/10.1016/j.neuropsychologia.2017.10.031>

## Band Ratios

- 793 Gramfort, A., Luessi, M., Larson, E., Engemann, D. A., Strohmeier, D., Brodbeck, C., Parkkonen,  
794 L., & Hämäläinen, M. S. (2014). MNE software for processing MEG and EEG data.  
795 *NeuroImage*, 86, 446–460. <https://doi.org/10.1016/j.neuroimage.2013.10.027>
- 796 Haller, M., Donoghue, T., Peterson, E., Varma, P., Sebastian, P., Gao, R., Noto, T., Knight, R. T.,  
797 Shestyuk, A., & Voytek, B. (2018). Parameterizing neural power spectra. *BioRxiv*.  
798 <https://doi.org/10.1101/299859>
- 799 He, B. J. (2014). Scale-free brain activity: Past, present, and future. *Trends in Cognitive Sciences*,  
800 18(9), 480–487. <https://doi.org/10.1016/j.tics.2014.04.003>
- 801 He, W., Donoghue, T., Sowman, P. F., Seymour, R. A., Brock, J., Crain, S., Voytek, B., &  
802 Hillebrand, A. (2019). Co-Increasing Neuronal Noise and Beta Power in the Developing  
803 Brain. *BioRxiv*, 49.
- 804 Howells, F. M., Temmingh, H. S., Hsieh, J. H., van Dijen, A. V., Baldwin, D. S., & Stein, D. J.  
805 (2018). Electroencephalographic delta/alpha frequency activity differentiates psychotic  
806 disorders: A study of schizophrenia, bipolar disorder and methamphetamine-induced  
807 psychotic disorder. *Translational Psychiatry*, 8(1). [https://doi.org/10.1038/s41398-018-](https://doi.org/10.1038/s41398-018-0105-y)  
808 0105-y
- 809 Jurewicz, K., Paluch, K., Kublik, E., Rogala, J., Mikicin, M., & Wróbel, A. (2018). EEG-  
810 neurofeedback training of beta band (12–22 Hz) affects alpha and beta frequencies – A  
811 controlled study of a healthy population. *Neuropsychologia*, 108, 13–24.  
812 <https://doi.org/10.1016/j.neuropsychologia.2017.11.021>
- 813 Keune, P. M., Hansen, S., Weber, E., Zapf, F., Habich, J., Muenssinger, J., Wolf, S., Schönenberg,  
814 M., & Oschmann, P. (2017). Exploring resting-state EEG brain oscillatory activity in  
815 relation to cognitive functioning in multiple sclerosis. *Clinical Neurophysiology*, 128(9),  
816 1746–1754. <https://doi.org/10.1016/j.clinph.2017.06.253>

## Band Ratios

- 817 Kim, J., Goldsberry, M. E., Harmon, T. C., & Freeman, J. H. (2016). Developmental Changes in  
818 Hippocampal CA1 Single Neuron Firing and Theta Activity during Associative Learning.  
819 *PLOS ONE*, *11*(10), e0164781. <https://doi.org/10.1371/journal.pone.0164781>
- 820 Klimesch, W. (1999). EEG alpha and theta oscillations reflect cognitive and memory performance:  
821 A review and analysis. *Brain Research Reviews*, *29*(2), 169–195.  
822 [https://doi.org/10.1016/S0165-0173\(98\)00056-3](https://doi.org/10.1016/S0165-0173(98)00056-3)
- 823 Krakovská, A., & Mezeiová, K. (2011). Automatic sleep scoring: A search for an optimal  
824 combination of measures. *Artificial Intelligence in Medicine*, *53*(1), 25–33.  
825 <https://doi.org/10.1016/j.artmed.2011.06.004>
- 826 Langer, N., Ho, E. J., Alexander, L. M., Xu, H. Y., Jozanovic, R. K., Henin, S., Petroni, A., Cohen,  
827 S., Marcelle, E. T., Parra, L. C., Milham, M. P., & Kelly, S. P. (2017). A resource for  
828 assessing information processing in the developing brain using EEG and eye tracking.  
829 *Scientific Data*, *4*, 170040. <https://doi.org/10.1038/sdata.2017.40>
- 830 Lansbergen, M. M., Arns, M., van Dongen-Boomsma, M., Spronk, D., & Buitelaar, J. K. (2011).  
831 The increase in theta/beta ratio on resting-state EEG in boys with attention-  
832 deficit/hyperactivity disorder is mediated by slow alpha peak frequency. *Progress in Neuro-*  
833 *Psychopharmacology and Biological Psychiatry*, *35*(1), 47–52.  
834 <https://doi.org/10.1016/j.pnpbp.2010.08.004>
- 835 Lendner, J. D., Helfrich, R. F., Mander, B. A., Romundstad, L., Lin, J. J., Walker, M. P., Larsson, P.  
836 G., & Knight, R. T. (2019). An Electrophysiological Marker of Arousal Level in Humans.  
837 *BioRxiv*. <https://doi.org/10.1101/625210>
- 838 Liechti, M. D., Valko, L., Müller, U. C., Döhnert, M., Drechsler, R., Steinhausen, H.-C., &  
839 Brandeis, D. (2013). Diagnostic Value of Resting Electroencephalogram in Attention-  
840 Deficit/Hyperactivity Disorder Across the Lifespan. *Brain Topography*, *26*(1), 135–151.  
841 <https://doi.org/10.1007/s10548-012-0258-6>

## Band Ratios

- 842 Limin Yang, Wenya Nan, Xiaoting Qu, Feng Wan, Pui-In Mak, Peng Un Mak, Vai, M. I., Yong  
843 Hu, & Rosa, A. (2015). Beta/theta ratio neurofeedback training effects on the spectral  
844 topography of EEG. *37th Annual International Conference of the IEEE Engineering in  
845 Medicine and Biology Society (EMBC)*, 4741–4744.  
846 <https://doi.org/10.1109/EMBC.2015.7319453>
- 847 Long, C. W., Shah, N. K., Loughlin, C., Spydell, J., & Bedford, R. F. (1989). A Comparison of  
848 EEG Determinants of Near-Awakening from Isoflurane and Fentanyl Anesthesia: Spectral  
849 Edge, Median Power Frequency, and  $\delta$  Ratio. *Anesthesia & Analgesia*, *69*(2), 169–173.  
850 <https://doi.org/10.1213/00000539-198908000-00005>
- 851 Loo, S. K., & Makeig, S. (2012). Clinical Utility of EEG in Attention-Deficit/Hyperactivity  
852 Disorder: A Research Update. *Neurotherapeutics*, *9*(3), 569–587.  
853 <https://doi.org/10.1007/s13311-012-0131-z>
- 854 Lubar, J. F. (1991). Discourse on the development of EEG diagnostics and biofeedback for  
855 attention-deficit/hyperactivity disorders. *Biofeedback and Self-Regulation*, *16*(3), 201–225.  
856 <https://doi.org/10.1007/BF01000016>
- 857 Matoušek, M. (1968). Frequency Analysis in Routine Electroencephalography.  
858 *Electroencephalography and Clinical Neurophysiology*, *24*(4), 365–373.  
859 [https://doi.org/10.1016/0013-4694\(68\)90197-1](https://doi.org/10.1016/0013-4694(68)90197-1)
- 860 Matoušek, M., & Petersén, I. (1973). Automatic evaluation of EEG background activity by means  
861 of age-dependent EEG quotients. *Electroencephalography and Clinical Neurophysiology*,  
862 *35*(6), 603–612. [https://doi.org/10.1016/0013-4694\(73\)90213-7](https://doi.org/10.1016/0013-4694(73)90213-7)
- 863 Matoušek, M., & Petersén, I. (1983). A method for assessing alertness fluctuations from EEG  
864 spectra. *Electroencephalography and Clinical Neurophysiology*, *55*(1), 108–113.  
865 [https://doi.org/10.1016/0013-4694\(83\)90154-2](https://doi.org/10.1016/0013-4694(83)90154-2)

## Band Ratios

- 866 Monastra, V. J., Lubar, J. F., & Linden, M. (2001). The development of a quantitative  
867 electroencephalographic scanning process for attention deficit-hyperactivity disorder:  
868 Reliability and validity studies. *Neuropsychology*, *15*(1), 136–144.  
869 <https://doi.org/10.1037//0894-4105.15.1.136>
- 870 Moretti, D. V., Fracassi, C., Pievani, M., Geroldi, C., Binetti, G., Zanetti, O., Sosta, K., Rossini, P.  
871 M., & Frisoni, G. B. (2009). Increase of theta/gamma ratio is associated with memory  
872 impairment. *Clinical Neurophysiology*, *120*(2), 295–303.  
873 <https://doi.org/10.1016/j.clinph.2008.11.012>
- 874 Moretti, D. V., Paternicò, D., Binetti, G., Zanetti, O., & Frisoni, G. B. (2013). EEG upper/low alpha  
875 frequency power ratio relates to temporo-parietal brain atrophy and memory performances  
876 in mild cognitive impairment. *Frontiers in Aging Neuroscience*, *5*.  
877 <https://doi.org/10.3389/fnagi.2013.00063>
- 878 Nokia, M. S., Penttonen, M., Korhonen, T., & Wikgren, J. (2008). Hippocampal theta (3–8Hz)  
879 activity during classical eyeblink conditioning in rabbits. *Neurobiology of Learning and*  
880 *Memory*, *90*(1), 62–70. <https://doi.org/10.1016/j.nlm.2008.01.005>
- 881 Ogrim, G., Kropotov, J., & Hestad, K. (2012). The quantitative EEG theta/beta ratio in attention  
882 deficit/hyperactivity disorder and normal controls: Sensitivity, specificity, and behavioral  
883 correlates. *Psychiatry Research*, *198*(3), 482–488.  
884 <https://doi.org/10.1016/j.psychres.2011.12.041>
- 885 Ohlund, B. (2000). *An Investigation of the Reliability and Validity of Theta/Beta Ratio*  
886 *Measurement* [PhD Thesis]. Arizona State University.
- 887 Penttilä, M., Partanen, J. V., Soininen, H., & Riekkinen, P. J. (1985). Quantitative analysis of  
888 occipital EEG in different stages of Alzheimer's disease. *Electroencephalography and*  
889 *Clinical Neurophysiology*, *60*(1), 1–6. [https://doi.org/10.1016/0013-4694\(85\)90942-3](https://doi.org/10.1016/0013-4694(85)90942-3)



## Band Ratios

- 890 Pfurtscheller, G., Schwarz, G., & List, W. (1986). Long-lasting EEG reactions in comatose patients  
891 after repetitive stimulation. *Electroencephalography and Clinical Neurophysiology*, *64*,  
892 402–410. [https://doi.org/10.1016/0013-4694\(86\)90073-8](https://doi.org/10.1016/0013-4694(86)90073-8)
- 893 Podvalny, E., Noy, N., Harel, M., Bickel, S., Chechik, G., Schroeder, C. E., Mehta, A. D., Tsodyks,  
894 M., & Malach, R. (2015). A unifying principle underlying the extracellular field potential  
895 spectral responses in the human cortex. *Journal of Neurophysiology*, *114*(1), 505–519.  
896 <https://doi.org/10.1152/jn.00943.2014>
- 897 Poza, J., Hornero, R., Abásolo, D., Fernández, A., & Mayo, A. (2008). Evaluation of spectral ratio  
898 measures from spontaneous MEG recordings in patients with Alzheimer’s disease.  
899 *Computer Methods and Programs in Biomedicine*, *90*(2), 137–147.  
900 <https://doi.org/10.1016/j.cmpb.2007.12.004>
- 901 Putman, P., van Peer, J., Maimari, I., & van der Werff, S. (2010). EEG theta/beta ratio in relation to  
902 fear-modulated response-inhibition, attentional control, and affective traits. *Biological*  
903 *Psychology*, *83*(2), 73–78. <https://doi.org/10.1016/j.biopsycho.2009.10.008>
- 904 Raymond, J., Varney, C., Parkinson, L. A., & Gruzelier, J. H. (2005). The effects of alpha/theta  
905 neurofeedback on personality and mood. *Cognitive Brain Research*, *23*(2–3), 287–292.  
906 <https://doi.org/10.1016/j.cogbrainres.2004.10.023>
- 907 Reed, C. M., Birch, K. G., Kamiński, J., Sullivan, S., Chung, J. M., Mamelak, A. N., & Rutishauser,  
908 U. (2017). Automatic detection of periods of slow wave sleep based on intracranial depth  
909 electrode recordings. *Journal of Neuroscience Methods*, *282*, 1–8.  
910 <https://doi.org/10.1016/j.jneumeth.2017.02.009>
- 911 Robertson, M. M., Furlong, S., Voytek, B., Donoghue, T., Boettiger, C. A., & Sheridan, M. A.  
912 (2019). EEG Power Spectral Slope differs by ADHD status and stimulant medication  
913 exposure in early childhood. *Journal of Neurophysiology*.  
914 <https://doi.org/10.1152/jn.00388.2019>

## Band Ratios

- 915 Saad, J. F., Kohn, M. R., Clarke, S., Lagopoulos, J., & Hermens, D. F. (2018). Is the Theta/Beta  
916 EEG Marker for ADHD Inherently Flawed? *Journal of Attention Disorders*, 22(9), 815–826.  
917 <https://doi.org/10.1177/1087054715578270>
- 918 Schutter, D. J. L. G., & Van Honk, J. (2005). Electrophysiological ratio markers for the balance  
919 between reward and punishment. *Cognitive Brain Research*, 24(3), 685–690.  
920 <https://doi.org/10.1016/j.cogbrainres.2005.04.002>
- 921 Sheorajpanday, R. V. A., Nagels, G., Weeren, A. J. T. M., van Putten, M. J. A. M., & De Deyn, P.  
922 P. (2009). Reproducibility and clinical relevance of quantitative EEG parameters in cerebral  
923 ischemia: A basic approach. *Clinical Neurophysiology*, 120(5), 845–855.  
924 <https://doi.org/10.1016/j.clinph.2009.02.171>
- 925 Snyder, S. M., & Hall, J. R. (2006). A Meta-analysis of Quantitative EEG Power Associated With  
926 Attention-Deficit Hyperactivity Disorder: *Journal of Clinical Neurophysiology*, 23(5), 441–  
927 456. <https://doi.org/10.1097/01.wnp.0000221363.12503.78>
- 928 Snyder, S. M., Rugino, T. A., Hornig, M., & Stein, M. A. (2015). Integration of an EEG biomarker  
929 with a clinician’s ADHD evaluation. *Brain and Behavior*, 5(4), e00330.  
930 <https://doi.org/10.1002/brb3.330>
- 931 Studer, P., Kratz, O., Gevensleben, H., Rothenberger, A., Moll, G. H., Hautzinger, M., & Heinrich,  
932 H. (2014). Slow cortical potential and theta/beta neurofeedback training in adults: Effects on  
933 attentional processes and motor system excitability. *Frontiers in Human Neuroscience*, 8.  
934 <https://doi.org/10.3389/fnhum.2014.00555>
- 935 Tortella-Feliu, M., Morillas-Romero, A., Balle, M., Llabrés, J., Bornas, X., & Putman, P. (2014).  
936 Spontaneous EEG activity and spontaneous emotion regulation. *International Journal of*  
937 *Psychophysiology*, 94(3), 365–372. <https://doi.org/10.1016/j.ijpsycho.2014.09.003>
- 938 Trammell, J. P., MacRae, P. G., Davis, G., Bergstedt, D., & Anderson, A. E. (2017). The  
939 Relationship of Cognitive Performance and the Theta-Alpha Power Ratio Is Age-

## Band Ratios

- 940           Dependent: An EEG Study of Short Term Memory and Reasoning during Task and Resting-  
941           State in Healthy Young and Old Adults. *Frontiers in Aging Neuroscience*, 9.  
942           <https://doi.org/10.3389/fnagi.2017.00364>
- 943   van Luijtelaar, E., & Coenen, A. (1984). An EEG averaging technique for automated sleep-wake  
944           stage identification in the rat. *Physiology & Behavior*, 33(5), 837–841.  
945           [https://doi.org/10.1016/0031-9384\(84\)90056-8](https://doi.org/10.1016/0031-9384(84)90056-8)
- 946   van Son, D., De Blasio, F. M., Fogarty, J. S., Angelidis, A., Barry, R. J., & Putman, P. (2019).  
947           Frontal EEG theta/beta ratio during mind wandering episodes. *Biological Psychology*, 140,  
948           19–27. <https://doi.org/10.1016/j.biopsycho.2018.11.003>
- 949   van Son, D., Schalbroeck, R., Angelidis, A., van der Wee, N. J. A., van der Does, W., & Putman, P.  
950           (2018). Acute effects of caffeine on threat-selective attention: Moderation by anxiety and  
951           EEG theta/beta ratio. *Biological Psychology*, 136, 100–110.  
952           <https://doi.org/10.1016/j.biopsycho.2018.05.006>
- 953   Vernon, D., Egner, T., Cooper, N., Compton, T., Neilands, C., Sheri, A., & Gruzelier, J. (2003). The  
954           effect of training distinct neurofeedback protocols on aspects of cognitive performance.  
955           *International Journal of Psychophysiology*, 47(1), 75–85. [https://doi.org/10.1016/S0167-](https://doi.org/10.1016/S0167-8760(02)00091-0)  
956           8760(02)00091-0
- 957   Voytek, B., Kramer, M. A., Case, J., Lepage, K. Q., Tempesta, Z. R., Knight, R. T., & Gazzaley, A.  
958           (2015). Age-Related Changes in 1/f Neural Electrophysiological Noise. *Journal of*  
959           *Neuroscience*, 35(38), 13257–13265. <https://doi.org/10.1523/JNEUROSCI.2332-14.2015>
- 960   Wang, Y., Sokhadze, E. M., El-Baz, A. S., Li, X., Sears, L., Casanova, M. F., & Tasman, A. (2016).  
961           Relative Power of Specific EEG Bands and Their Ratios during Neurofeedback Training in  
962           Children with Autism Spectrum Disorder. *Frontiers in Human Neuroscience*, 9.  
963           <https://doi.org/10.3389/fnhum.2015.00723>  
964

## Band Ratios

### 965 Supplementary Materials

|           |           | Theta     | Alpha     | Beta      |
|-----------|-----------|-----------|-----------|-----------|
| <b>CF</b> | Default   | 6         | 10        | 21.5      |
|           | Range     | 4 - 8     | 8 - 13    | 13 - 30   |
|           | Increment | 0.25      | 0.25      | 1         |
| <b>PW</b> | Default   | 0.5       | 0.5       | 0.5       |
|           | Range     | 0 - 1.0   | 0 - 1.0   | 0 - 1.0   |
|           | Increment | 0.1       | 0.1       | 0.1       |
| <b>BW</b> | Default   | 0.1       | 0.1       | 0.1       |
|           | Range     | 0.2 - 0.4 | 0.2 - 0.4 | 0.2 - 0.4 |
|           | Increment | 0.2       | 0.2       | 0.2       |

Supplemental Table 1. Simulation Parameters for Periodic Components

966

|                 | Default | Range   | Increment |
|-----------------|---------|---------|-----------|
| <b>Offset</b>   | 0       | 0 - 2.5 | 0.25      |
| <b>Exponent</b> | 1       | 0 - 3   | 0.2       |

Supplemental Table 2. Simulation Parameters for Aperiodic Components
